# Supplementary material
Source: PubMed Central journal article supplement (PMC4138513)

Supplementary figure S1

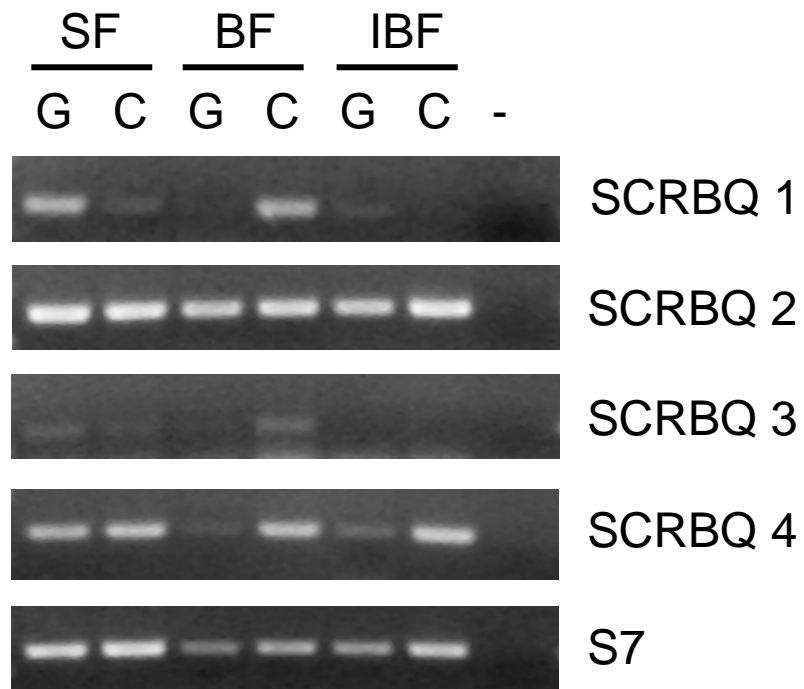

Supplementary figure S2

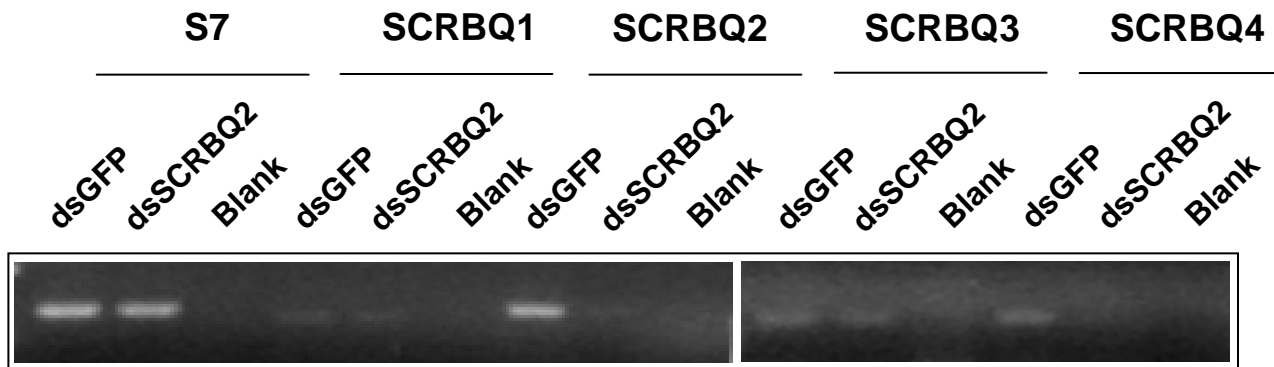

Supplement: NIHMS621245-supplement-01.pdf [file NIHMS621245-supplement-01.pdf]
